# Supplementary figures and images for: Choroid Plexus–Infiltrating T Cells as Drivers of Murine Neuropsychiatric Lupus
Source: PubMed Central journal article supplement — Arthritis Rheumatol. 2022 Sep 21;74(11):1796–807. doi: 10.1002/art.42252 (PMC9825865; doi:10.1002/art.42252), 2022-09-21

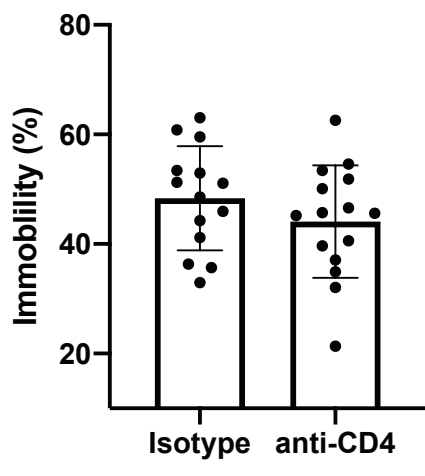

**A**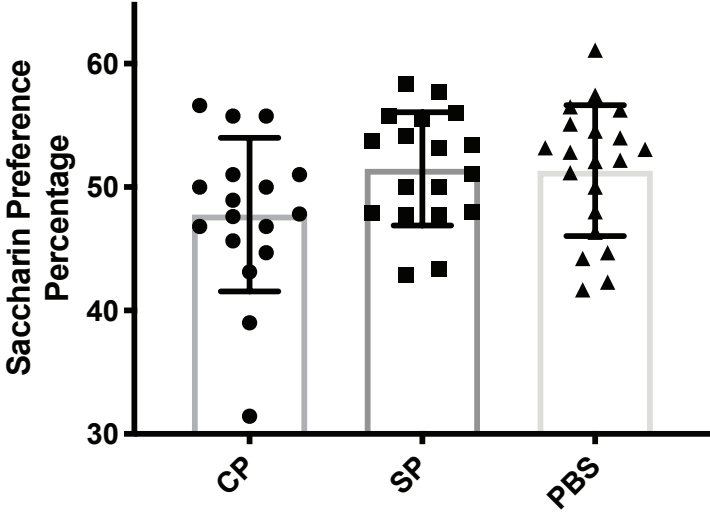**B**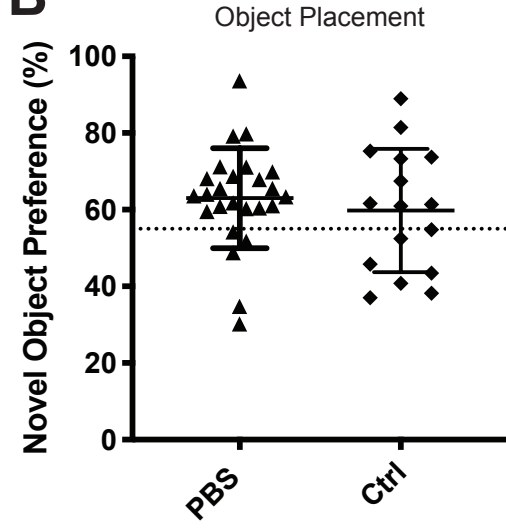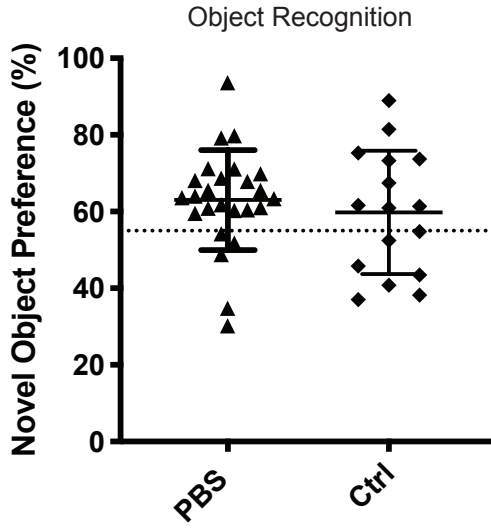**C**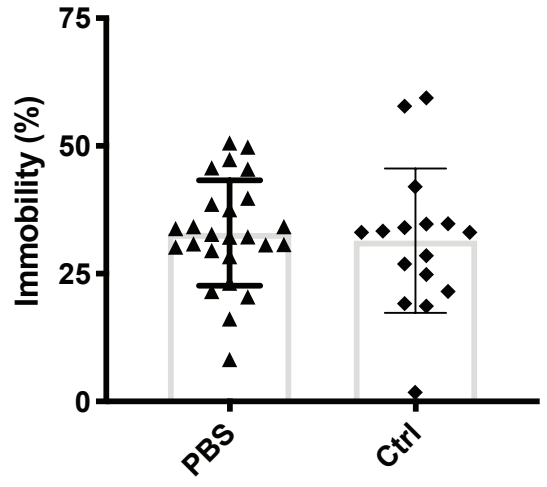

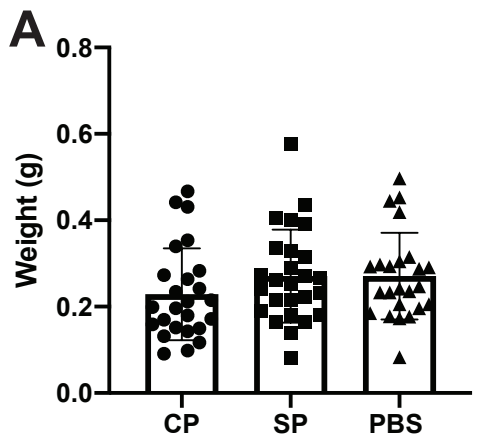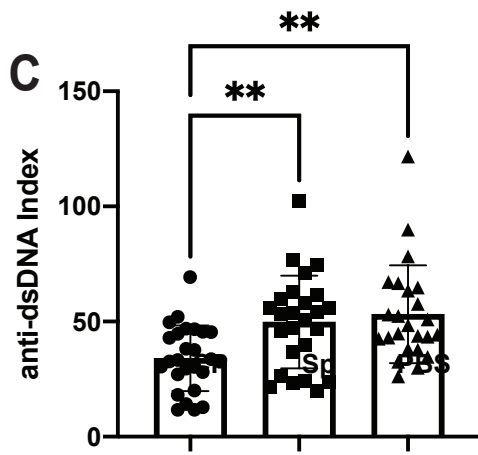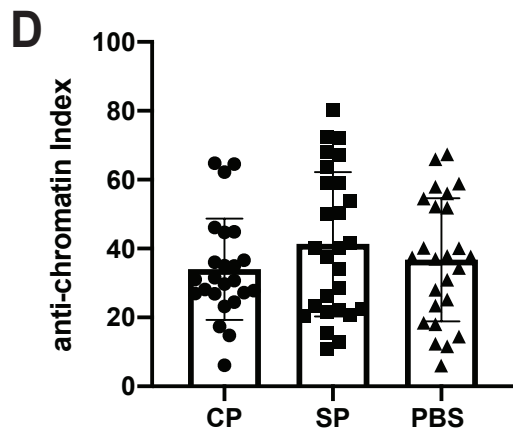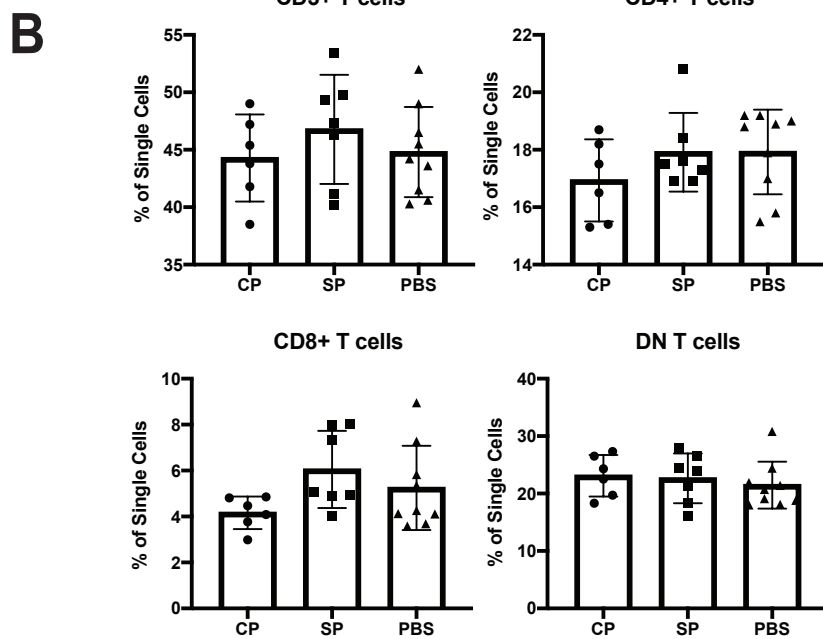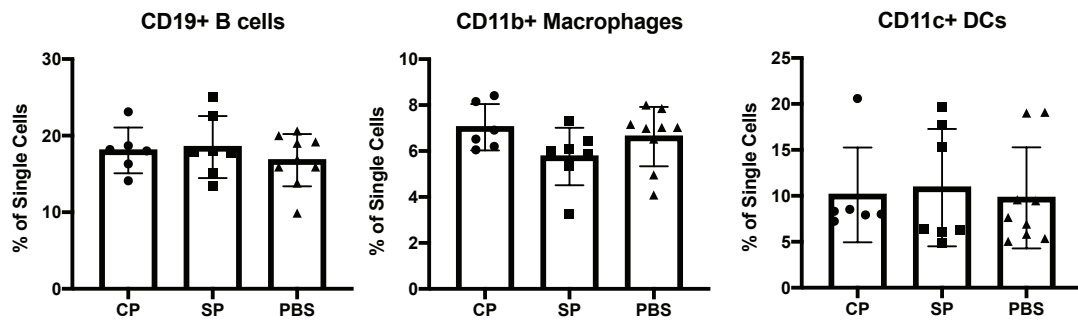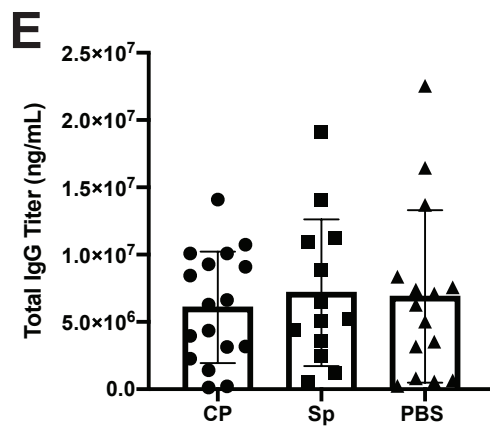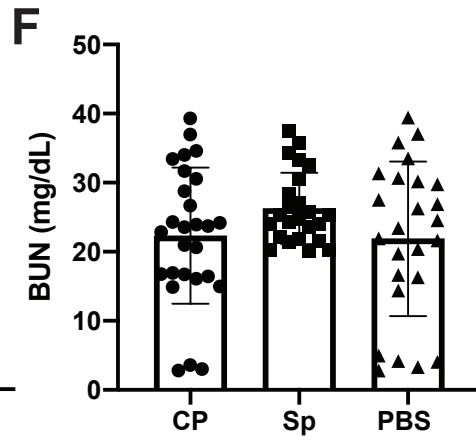

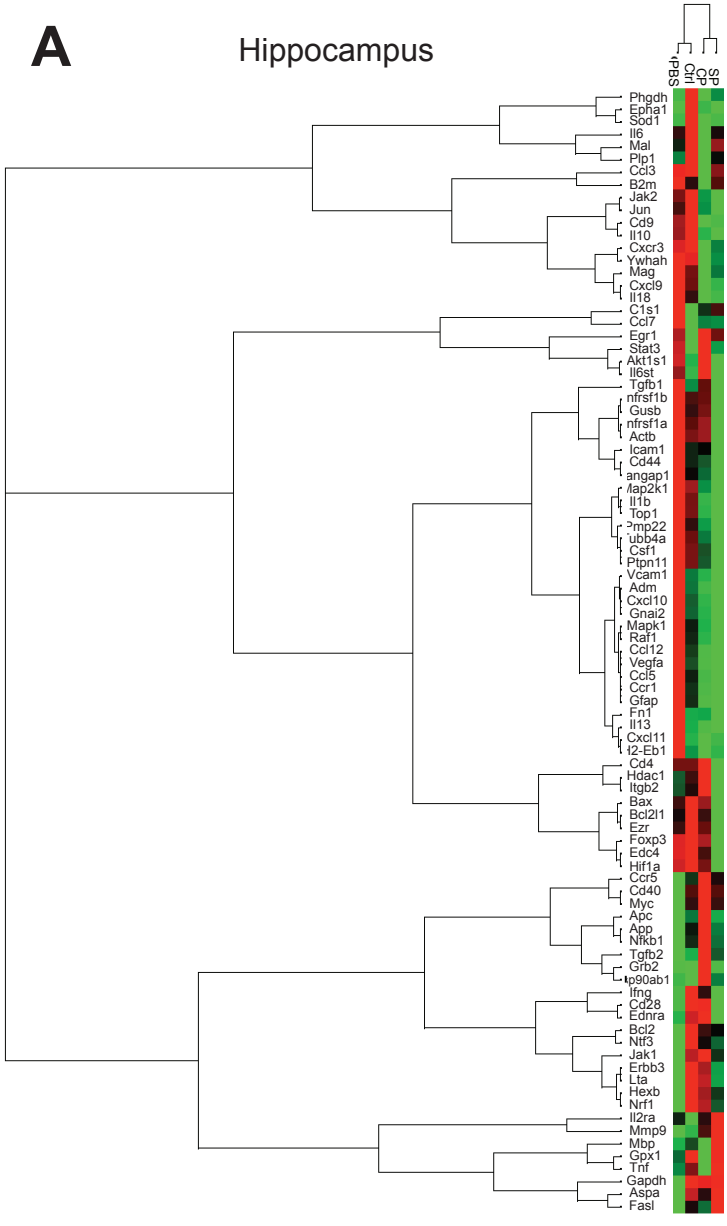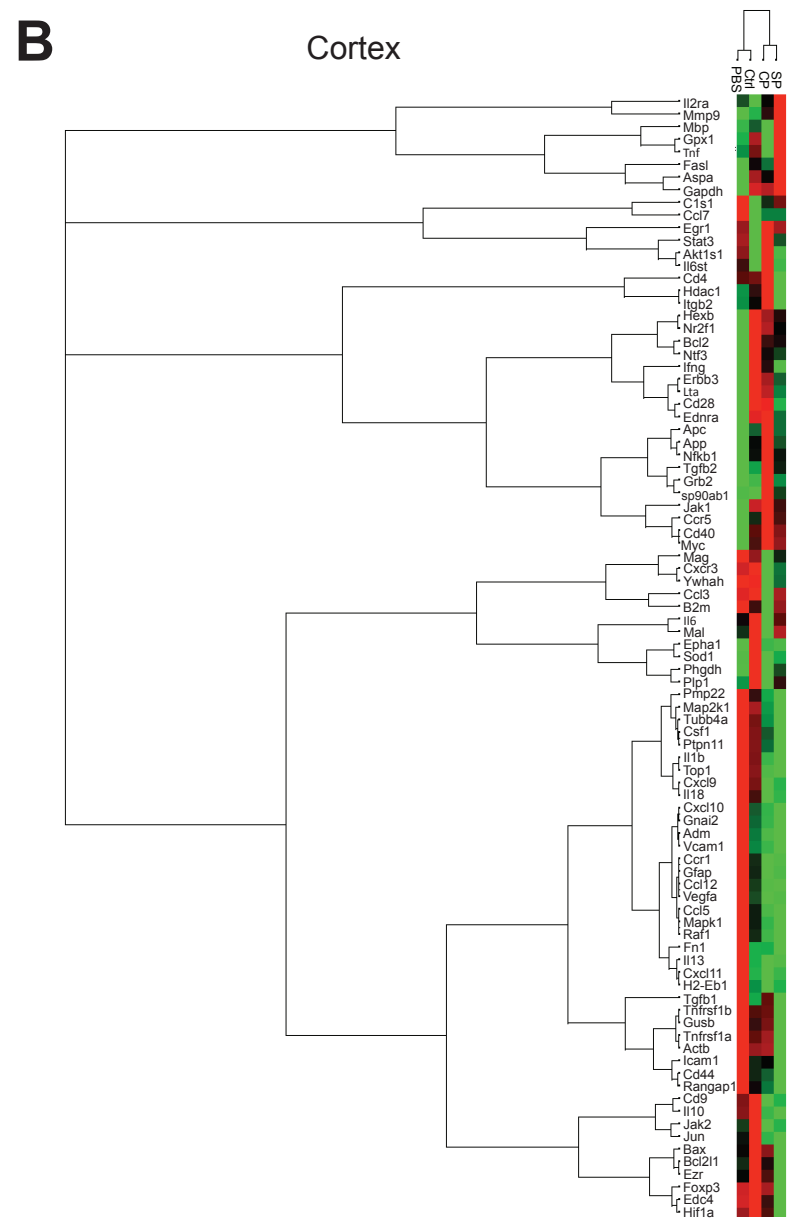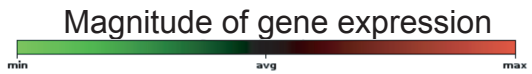

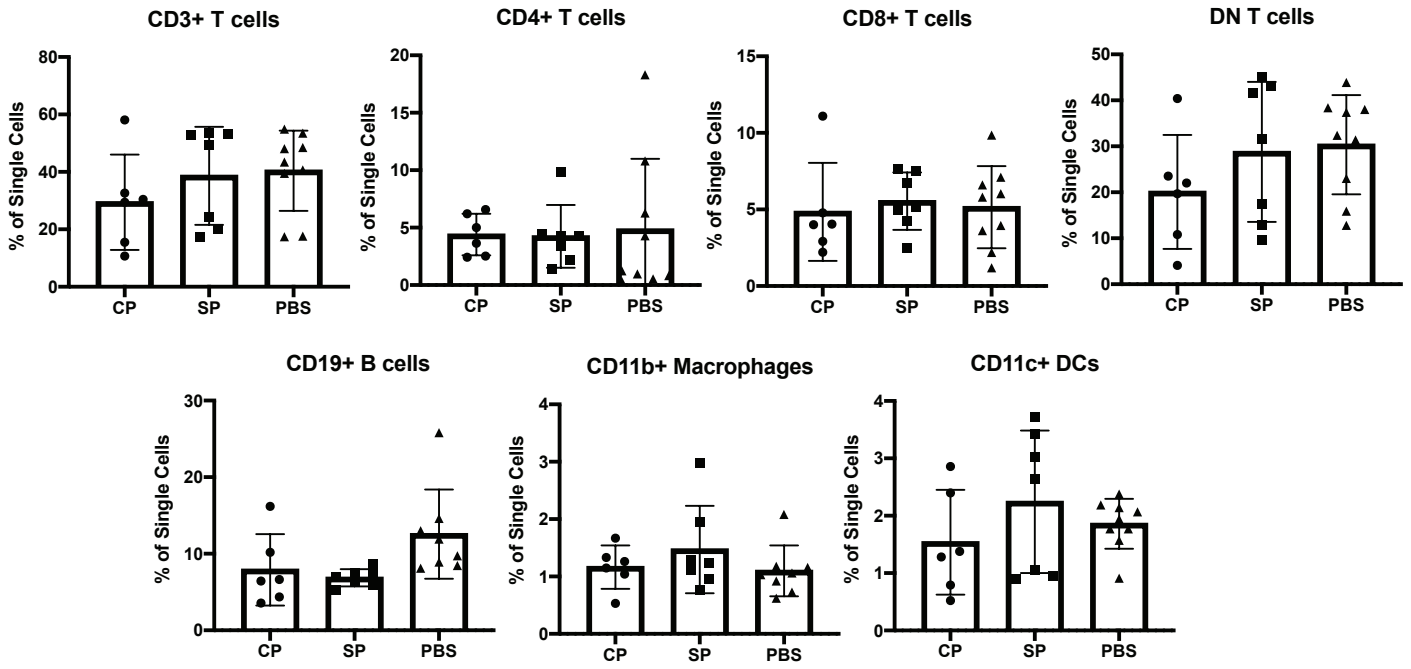

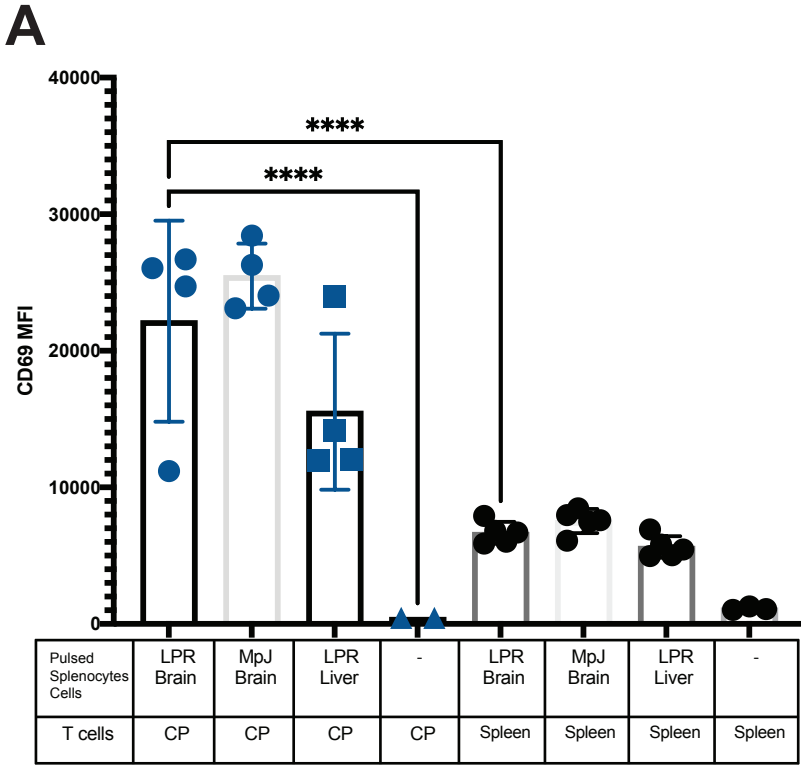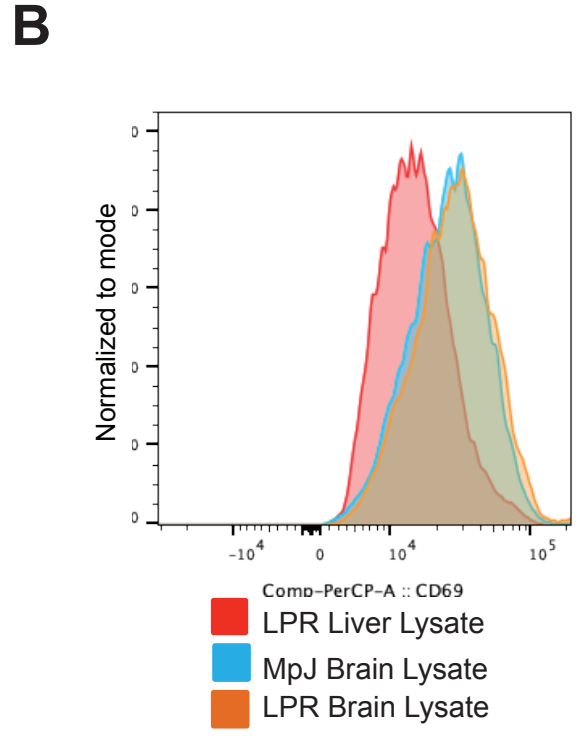

Supplement: ART-74-1796-s002.pdf [file ART-74-1796-s002.pdf]
